# Supplementary material for: Functional connectivity modeling of consistent cortico-striatal degeneration in Huntington's disease
Source: PubMed Central journal article supplement — Neuroimage Clin. 2015 Feb 27;7:640–52. doi: 10.1016/j.nicl.2015.02.018 (PMC4375786; doi:10.1016/j.nicl.2015.02.018), 2015-02-27

# Functional connectivity modeling of consistent cortico-striatal degeneration in Huntington's disease

## - Supplementary data -

**Table S-1** Meta-analytic connectivity modeling and resting-state connectivity of consistent striatal degeneration in HD

**Table S-2** Meta-analytic connectivity modeling and resting-state connectivity of cortical and striatal seeds in *premanifest* HD

**Table S-3** Meta-analytic connectivity modeling of cortical and striatal seeds in *manifest* HD.

**Table S-4** Resting-state connectivity of cortical and striatal seeds in *manifest* HD.

**Table S-5** Conjunction between MACM and resting-state connectivity maps in *manifest* HD.

**Table S-6** Contrast maps between *premanifest* and *manifest* connectivity (MOG-striatal vs IFJ-striatal seeds)

**Table S-7** Contrast maps between *premanifest* and *manifest* connectivity (MOG-striatal vs M1-striatal seeds)

**Figure S-1** Overview on workflow with applied techniques and related research questions

**Figure S-2** Functional characterization by behavioral domains and paradigm classes of **a** premanifest striatal (*yellow*) and MOG (*blue*) atrophy seeds; **b** manifest striatal (*yellow*), IFJ (*green*) and M1 (*red*) atrophy seeds. Bar plots show significant associations (at  $p < 0.05$ , Bonferroni corrected for multiple comparison) of a behavioral domains and paradigm class from BrainMap meta-data given observed brain activity (and *vice versa*); x-axis indicates relative probability values.

**Table S-1** Meta-analytic connectivity modeling and resting-state connectivity of consistent striatal degeneration in HD

| k <sub>E</sub>                                                                     | MNI co-ordinates |     |     |      | Macroanatomical and cytoarchitectonic area                         | k <sub>E</sub> | MNI co-ordinates |     |     |      | Macroanatomical and cytoarchitectonic area                                |
|------------------------------------------------------------------------------------|------------------|-----|-----|------|--------------------------------------------------------------------|----------------|------------------|-----|-----|------|---------------------------------------------------------------------------|
|                                                                                    | x                | y   | z   | Lat. |                                                                    |                | x                | y   | z   | Lat. |                                                                           |
| <b>MACM map of left and right striatal seeds</b>                                   |                  |     |     |      | <b>Resting-state connectivity of left and right striatal seeds</b> |                |                  |     |     |      |                                                                           |
| 16,407                                                                             | 12               | 10  | 0   | R    | Caudate nucleus                                                    | 28,592         | 8                | 10  | 4   | R    | Caudate nucleus                                                           |
|                                                                                    | -12              | 8   | 2   | L    | Caudate nucleus                                                    |                | -12              | 10  | 6   | L    | Caudate nucleus                                                           |
|                                                                                    | 18               | 8   | 2   | R    | Pallidum, Putamen                                                  |                | 22               | 6   | -8  | R    | Putamen, Pallidum                                                         |
|                                                                                    | -20              | 4   | 4   | L    | Putamen, Pallidum                                                  |                | -18              | 14  | -4  | L    | Putamen, Pallidum                                                         |
|                                                                                    | -32              | 20  | 2   | L    | Insula                                                             |                | 26               | -4  | 2   | R    | Pallidum                                                                  |
|                                                                                    | 34               | 22  | -2  | R    | Insula                                                             |                |                  |     |     | L/R  | Thalamus [prefrontal, temporal, parietal, premotor, motor, somatosensory] |
|                                                                                    | -12              | -16 | 6   | L    | Thalamus [prefrontal,temporal,parietal,pre-/motor]                 |                |                  |     |     | L/R  | Amygdala [SF, LB, CM]                                                     |
|                                                                                    | 10               | -16 | 6   | R    | Thalamus [prefrontal,temporal,parietal,premotor]                   |                |                  |     |     | L/R  | Insula [lg1, lg2]                                                         |
|                                                                                    |                  |     |     | L/R  | Amygdala [SF, CM]                                                  |                |                  |     |     | L/R  | Inferior frontal gyrus [BA 44, 45]                                        |
|                                                                                    | 50               | 12  | 2   | R/L  | Inferior frontal [BA 44, 45], middle frontal gyrus                 |                |                  |     |     | L    | Middle and superior frontal gyrus                                         |
|                                                                                    |                  |     |     | R    | Precentral gyrus, PMC [BA 6]                                       |                |                  |     |     | L/R  | Precentral gyrus, PMC [BA6], M1 [4a, 4p]                                  |
|                                                                                    | -52              | 8   | 32  | L    | Precentral gyrus, PMC [BA 6], M1 [BA 4a,p]                         |                |                  |     |     | L/R  | SMA [BA6], Anterior and middle cingulate cortex                           |
|                                                                                    | -30              | -54 | 50  | L    | IPS [hIP1-3], SPL [7A,7PC], IPC [PFt], SI [BA 2,3b]                |                |                  |     |     | L/R  | Heschl's gyrus [TE 1.0, 1.1]                                              |
| 3,135                                                                              | 0                | 10  | 48  | L/R  | SMA [BA 6]                                                         |                |                  |     |     | R    | Parietal operculum [OP2]                                                  |
|                                                                                    | 0                | 2   | 54  | L/R  | Middle cingulate cortex                                            |                |                  |     |     | L/R  | Cerebellum [Lobule I-IV]                                                  |
| 500                                                                                | 36               | -46 | 46  | R    | IPS [hIP1-3], SPL [7A]                                             |                |                  |     |     |      |                                                                           |
| 271                                                                                | -56              | -22 | 22  | L    | IPC [PFop], parietal operculum [OP1]                               | 210            | 38               | -84 | -40 | R    | Cerebellum [Lobule VIIa Crus I, II]                                       |
| 132                                                                                | 60               | -36 | 20  | R    | IPC [PF, PFcm]                                                     | 201            | 32               | -68 | -30 | R    | Cerebellum [Lobule VIIa Crus I]                                           |
| 57                                                                                 | 62               | -28 | 4   | R    | Superior temporal gyrus                                            |                | 34               | -56 | -32 | R    | Cerebellum [Lobule VI]                                                    |
| 502                                                                                | -28              | -60 | -26 | L    | Cerebellum [Lobule VI], Fusiform gyrus, inferior occipital gyrus   | 158            | -48              | -62 | 52  | L    | IPC [PFm, PGa, PF]                                                        |
|                                                                                    |                  |     |     |      |                                                                    | 72             | 56               | -60 | 44  | R    | IPC [PFm, PGa], Angular gyrus                                             |
| 293                                                                                | 26               | -64 | -24 | R    | Cerebellum [Lobule VI]                                             | 101            | -42              | 58  | -6  | L    | Middle Orbital Gyrus                                                      |
| <b>Conjunction: MACM &amp; Resting-state maps of left and right striatal seeds</b> |                  |     |     |      |                                                                    |                |                  |     |     |      |                                                                           |
| 10,156                                                                             | -6               | 5   | 9   | L/R  | Caudate nucleus, Putamen, Pallidum                                 |                |                  |     |     | L/R  | Insula                                                                    |
|                                                                                    |                  |     |     | L/R  | Thalamus [prefrontal,temporal,parietal,premotor]                   |                |                  |     |     | L/R  | Inferior frontal gyrus [BA 44, 45]                                        |
|                                                                                    |                  |     |     | L    | Thalamus [motor]                                                   |                |                  |     |     | L/R  | PMC [BA 6], M1 [BA 4a]                                                    |
|                                                                                    |                  |     |     | L/R  | Amygdala [SF]                                                      | 2,524          | 6                | 24  | 22  | L/R  | Middle cingulate cortex, SMA [BA6]                                        |

Results are cluster-level FWE corrected at  $p < 0.05$  (cluster-forming threshold at voxel-level  $p < 0.001$ ); k<sub>E</sub>: cluster extent; Lat.: laterality; L: left; R: right; BA: Brodmann Area; SI: primary somatosensory cortex; PMC: premotor cortex; SMA: supplementary motor area; M1: primary motor cortex; SI: primary somatosensory cortex; IPS: intraparietal sulcus; IPC: inferior parietal cortex; SPL: superior parietal lobule.

**Table S-2** Meta-analytic connectivity modeling and resting-state connectivity of cortical and striatal seeds in premanifest HD

| $k_E$                                                                                           | MNI co-ordinates |     |     | Lat. | Macroanatomical and cytoarchitectonic region         |
|-------------------------------------------------------------------------------------------------|------------------|-----|-----|------|------------------------------------------------------|
|                                                                                                 | x                | y   | z   |      |                                                      |
| <b>MACM map of right MOG and striatal seeds</b>                                                 |                  |     |     |      |                                                      |
| 717                                                                                             | -16              | 2   | 14  | L    | Caudate nucleus                                      |
|                                                                                                 | -20              | 2   | 10  | L    | Putamen                                              |
|                                                                                                 | -14              | 2   | 0   | L    | Pallidum                                             |
|                                                                                                 | -28              | 20  | 4   | L    | Anterior insula                                      |
| 320                                                                                             | 18               | 8   | 2   | R    | Pallidum                                             |
|                                                                                                 | 14               | 10  | 4   | R    | Caudate nucleus; putamen                             |
| 472                                                                                             | 36               | 20  | 2   | R    | Anterior insula; inferior frontal gyrus, p.orbitalis |
| 430                                                                                             | -52              | 10  | 24  | L    | Inferior frontal gyrus, p.opercularis [BA 44]        |
|                                                                                                 | -40              | 4   | 30  | L    | Precentral gyrus                                     |
| 246                                                                                             | 48               | 10  | 28  | R    | Inferior frontal gyrus, p opercularis [BA 44]        |
|                                                                                                 | 50               | 6   | 34  | R    | Precentral gyrus                                     |
| 200                                                                                             | 26               | -4  | 60  | R    | Superior frontal gyrus                               |
|                                                                                                 | 42               | 0   | 56  | R    | Middle frontal gyrus                                 |
| 137                                                                                             | 50               | 30  | 20  | R    | Inferior frontal gyrus, p triangularis               |
|                                                                                                 | 42               | 38  | 24  | R    | Middle frontal gyrus                                 |
| 449                                                                                             | 2                | 12  | 50  | L/R  | SMA [BA 6]                                           |
| 1,287                                                                                           | 32               | -70 | 32  | R    | Middle occipital gyrus                               |
|                                                                                                 | 34               | -46 | 46  | R    | IPS [hIP3,2]; SI [BA 2]                              |
|                                                                                                 | 28               | -64 | 52  | R    | SPL [7A, 7PC]                                        |
| 597                                                                                             | -26              | -62 | 52  | L    | SPL [BA 7A]; IPS [hIP3]                              |
|                                                                                                 | -28              | -68 | 36  | L    | Middle occipital gyrus; Superior occipital gyrus     |
| <b>Resting-state connectivity of right MOG and striatal seeds</b>                               |                  |     |     |      |                                                      |
| 822                                                                                             | -50              | 8   | 22  | L    | Inferior frontal gyrus, p.opercularis [BA 44]        |
|                                                                                                 | -32              | -8  | 52  | L    | Precentral gyurs                                     |
|                                                                                                 | -42              | -4  | 56  | L    | PMC [BA6]                                            |
|                                                                                                 | -22              | -2  | 58  | L    | Superior frontal gyrus                               |
| 439                                                                                             | 54               | 8   | 20  | R    | Inferior frontal gyrus, p.opercularis [BA 44]        |
|                                                                                                 | 56               | 8   | 36  | R    | Precentral gyrus                                     |
|                                                                                                 | 42               | -2  | 52  | R    | Middle frontal gyrus                                 |
|                                                                                                 | 26               | -6  | 64  | R    | Superior frontal gyrus; PMC [BA6]                    |
| 207                                                                                             | -58              | -34 | 46  | L    | IPC [PF, Pft]                                        |
| 169                                                                                             | 60               | -28 | 42  | R    | IPC [PF, Pft]                                        |
| 162                                                                                             | -46              | 32  | 10  | L    | Inferior frontal gyrus, p.triangularis [BA45]        |
| 114                                                                                             | 54               | 34  | 10  | R    | Inferior frontal gyrus, p.triangularis [BA45]        |
| 74                                                                                              | 28               | -72 | -54 | R    | Cerebellum [Lobule VII]                              |
| <b>Conjunction: MACM &amp; Resting-state maps of right MOG <math>\cap</math> striatal seeds</b> |                  |     |     |      |                                                      |
| 195                                                                                             | -50              | 8   | 22  | L    | Inferior frontal gyrus, p. opercularis [BA 44]       |
|                                                                                                 | -54              | 4   | 36  | L    | Precentral gyrus                                     |
| 59                                                                                              | 56               | 8   | 36  | R    | Precentral gyrus, inferior frontal gyrus             |

Results are cluster-level FWE corrected at  $p < 0.05$  (cluster-forming threshold at voxel-level  $p < 0.001$ );  $k_E$ : cluster extent; Lat.: laterality; L: left; R: right; BA: Brodmann Area; SI: primary somatosensory cortex; PMC: premotor cortex; SMA: supplementary motor area; M1: primary motor cortex; SI: primary somatosensory cortex; IPS: intraparietal sulcus; IPC: inferior parietal cortex; SPL: superior parietal lobule.

**Table S-3** Meta-analytic connectivity modeling of cortical and striatal seeds in manifest HD

| $k_E$                                                                                          | MNI co-ordinates |     |     | Lat. | Macroanatomical and cytoarchitectonic area                          | $k_E$                                                                                          | MNI co-ordinates |     |     | Lat. | Macroanatomical and cytoarchitectonic area       |                                          |
|------------------------------------------------------------------------------------------------|------------------|-----|-----|------|---------------------------------------------------------------------|------------------------------------------------------------------------------------------------|------------------|-----|-----|------|--------------------------------------------------|------------------------------------------|
|                                                                                                | x                | y   | z   |      |                                                                     |                                                                                                | x                | y   | z   |      |                                                  |                                          |
| <b>MACM map of IFJ <math>\cap</math> striatal seeds</b>                                        |                  |     |     |      |                                                                     | <b>MACM map of M1 <math>\cap</math> striatal seeds</b>                                         |                  |     |     |      |                                                  |                                          |
| 10,354                                                                                         | -14              | 4   | 10  | L    | Caudate nucleus                                                     | 7,550                                                                                          | -20              | 6   | 4   | L    | Putamen; pallidum                                |                                          |
|                                                                                                | 14               | 6   | 8   | R    | Caudate nucleus                                                     |                                                                                                | -14              | 4   | 10  | L    | Caudate nucleus                                  |                                          |
|                                                                                                | -18              | 4   | 6   | L    | Putamen; pallidum                                                   |                                                                                                | -34              | 24  | 0   | L    | Insula; parietal operculum, SII [OP1]            |                                          |
|                                                                                                | 22               | 6   | 4   | R    | Putamen                                                             |                                                                                                | -50              | 6   | 32  | L    | Inferior frontal gyrus [BA 44]                   |                                          |
|                                                                                                | 16               | 2   | 2   | R    | Pallidum                                                            |                                                                                                | -26              | -6  | 56  | L    | Middle frontal gyrus; PMC [BA 6]                 |                                          |
|                                                                                                | 10               | -14 | 10  | R/L  | Thalamus [prefrontal, temporal]                                     |                                                                                                | -36              | -22 | 54  | L    | M1 [BA 4a, p]; SI [BA 3b, 3a, 2]                 |                                          |
|                                                                                                | -34              | 22  | 0   | L    | Anterior Insula                                                     |                                                                                                | -42              | -40 | 42  | L    | IPS [hIP1-3]; IPC [PFt; PFop]; SPL [7A; 7PC]     |                                          |
|                                                                                                | 34               | 22  | -4  | R    | Anterior Insula                                                     | 2,883                                                                                          | 24               | 8   | 2   | R    | Putamen; caudate nucleus                         |                                          |
|                                                                                                | -44              | 8   | 30  | L    | Inferior frontal gyrus [BA 44,45]; PMC [BA 6]; Middle frontal gyrus |                                                                                                | 18               | -4  | -4  | R    | Pallidum                                         |                                          |
|                                                                                                | 46               | 8   | 28  | R    | Inferior frontal [BA 44,45]; middle frontal gyrus                   |                                                                                                | 10               | -16 | 6   | R    | Thalamus [Prefrontal, temporal, premotor]        |                                          |
| 2,187                                                                                          | -2               | 12  | 50  | L/R  | SMA [BA 6]                                                          |                                                                                                | 34               | 22  | -2  | R    | Insula                                           |                                          |
|                                                                                                | 4                | 30  | 38  | R/L  | Middle cingulate cortex                                             | 263                                                                                            | 58               | 10  | 24  | R    | Inferior frontal gyrus [BA 44]                   |                                          |
|                                                                                                | 2                | 28  | 40  | R/L  | Superior medial gyrus                                               | 475                                                                                            | 50               | 34  | 26  | R    | Inferior and middle frontal gyrus                |                                          |
| 1,713                                                                                          | -30              | -54 | 48  | L    | IPS [hIP1-3]; superior/middle occipital gyrus                       | 2,034                                                                                          | -14              | -18 | 6   | L    | Thalamus [Prefrontal, parietal, premotor, motor] |                                          |
|                                                                                                | -24              | -66 | 48  | L    | SPL [7A, 7PC, 7P]                                                   |                                                                                                | -2               | 2   | 56  | L/R  | SMA [BA 6]                                       |                                          |
|                                                                                                | -44              | -36 | 44  | L    | IPC [PFt, PF]; SI [BA 2]                                            | 1,127                                                                                          | 12               | 4   | 40  | L/R  | Middle cingulate cortex                          |                                          |
| 695                                                                                            | 36               | -46 | 44  | R    | IPS [hIP1-3]; SPL [7A, 7PC]; SI [BA 2]                              |                                                                                                | 40               | -4  | 58  | R    | PMC [BA 6]                                       |                                          |
| 241                                                                                            | -52              | -42 | 10  | L    | Middle temporal gyrus                                               |                                                                                                | 38               | -16 | 52  | R    | M1 [BA 4a, 4p]                                   |                                          |
| 539                                                                                            | -30              | -62 | -26 | L    | Cerebellum [lobule VI]                                              |                                                                                                | 40               | -42 | 58  | R    | SI [BA 2,3b]                                     |                                          |
|                                                                                                | -42              | -64 | -14 | L    | Fusiform gyrus                                                      |                                                                                                | 34               | -50 | 44  | R    | IPS [hIP1-3]; IPC [PFt]                          |                                          |
| 157                                                                                            | 28               | -50 | -24 | R    | Cerebellum [lobule VI]; fusiform gyrus                              | 347                                                                                            | 32               | -64 | 54  | R    | SPL [7A, 7PC]; Superior occipital gyrus          |                                          |
|                                                                                                |                  |     |     |      |                                                                     |                                                                                                | 58               | -20 | 22  | R    | Parietal operculum, SII [OP1]                    |                                          |
|                                                                                                |                  |     |     |      |                                                                     |                                                                                                | 62               | -34 | 22  | R    | IPC [PF, PFt, PFop]; SI [BA 2, 1]                |                                          |
|                                                                                                |                  |     |     |      |                                                                     |                                                                                                | 244              | -44 | -58 | -14  | L                                                | Inferior occipital gyrus; fusiform gyrus |
| <b>Contrast: MACM map of IFJ <math>\cap</math> striatum &gt; M1 <math>\cap</math> striatum</b> |                  |     |     |      |                                                                     | <b>Contrast: MACM map of M1 <math>\cap</math> striatum &gt; IFJ <math>\cap</math> striatum</b> |                  |     |     |      |                                                  |                                          |
| 601                                                                                            | -16              | -6  | 18  | L    | Caudate nucleus                                                     | 106                                                                                            | 26               | -10 | 6   | R    | Putamen                                          |                                          |
|                                                                                                | 12               | -2  | 16  | R    | Caudate nucleus                                                     |                                                                                                | 26               | -4  | -2  | R    | Pallidum                                         |                                          |
|                                                                                                | -4               | -18 | 14  | L    | Thalamus [temporal, prefrontal]                                     | 312                                                                                            | -32              | -6  | 2   | L    | Putamen                                          |                                          |
|                                                                                                | 4                | -10 | 10  | R    | Thalamus [temporal, prefrontal]                                     |                                                                                                | -22              | -6  | -6  | L    | Pallidum                                         |                                          |
| 2,066                                                                                          | -42              | 6   | 22  | L    | Inferior frontal gyrus [BA 44,45]; anterior insula                  |                                                                                                | -32              | -8  | 12  | L    | Insula                                           |                                          |
|                                                                                                | -38              | 40  | 18  | L    | Middle temporal gyrus                                               |                                                                                                | -44              | 2   | 10  | L    | Rolandic operculum                               |                                          |
|                                                                                                | -48              | 14  | -4  | L    | Temporal pole, anterior insula                                      | 155                                                                                            | -16              | -24 | 4   | L    | Thalamus [parietal, motor, premotor, prefrontal] |                                          |
|                                                                                                | -50              | 0   | 48  | L    | Precentral gyrus                                                    | 2,247                                                                                          | -32              | -12 | 60  | L    | PMC [BA 6]; M1 [BA 4p, 4a]; SI [BA 2, 3b,a, 1]   |                                          |
| 1,022                                                                                          | 46               | 6   | 26  | R    | Inferior frontal gyrus [BA 44]                                      |                                                                                                | -36              | -44 | 38  | L    | IPS [hIP1-3]                                     |                                          |
|                                                                                                | 44               | 4   | 42  | R    | Precentral gyrus, MFG                                               |                                                                                                | -56              | -28 | 20  | L    | IPC [PFop, PFt]                                  |                                          |
| 290                                                                                            | 44               | 28  | -2  | R    | Inferior frontal gyrus [BA 45]                                      |                                                                                                | -62              | -18 | 22  | L    | Parietal operculum, SII [OP4, OP1]               |                                          |
|                                                                                                |                  |     |     | R    | Anterior Insula                                                     |                                                                                                | -20              | 0   | 54  | L    | Superior frontal gyrus                           |                                          |
| 266                                                                                            | 42               | 40  | 20  | R    | Middle frontal gyrus                                                | 460                                                                                            | 38               | -16 | 52  | R    | M1 [BA 4a, 4p]; SI [BA 3b, 2]; PMC [BA 6]        |                                          |
| 1,068                                                                                          | 0                | 20  | 36  | L/R  | Middle cingulate cortex; Superior medial gyrus                      | 305                                                                                            | 60               | -18 | 26  | R    | IPC [PFt, PFop, PF]; parietal operculum [OP1]    |                                          |
|                                                                                                | 0                | 10  | 62  | L/R  | SMA [BA 6]                                                          |                                                                                                | 58               | -20 | 44  | R    | SI [BA 2, 1]                                     |                                          |
| 593                                                                                            | -26              | -52 | 44  | L    | IPS [hIP3]                                                          | 716                                                                                            | -6               | -6  | 54  | L    | SMA [BA 6]                                       |                                          |
|                                                                                                | -24              | -74 | 44  | L    | SPL [7A, 7P]; superior occipital gyrus                              |                                                                                                | 12               | -4  | 60  | R    | SMA [BA 6]                                       |                                          |
| 163                                                                                            | 36               | -58 | 54  | R    | SPL [7A]; IPS [hIP3]                                                |                                                                                                | -10              | 4   | 38  | L    | Middle cingulate cortex                          |                                          |
| 174                                                                                            | -50              | -50 | 6   | L    | Middle Temporal gyrus                                               | 233                                                                                            | -56              | 6   | 24  | L    | Inferior frontal gyurs [BA 44]; PMC [BA 6]       |                                          |
| 160                                                                                            | -34              | -64 | -24 | L    | Cerebellum [Lobule VI]; Fusiform gyrus                              | 165                                                                                            | 62               | 10  | 18  | R    | Inferior frontal gyrus [BA 44]; precentral gyrus |                                          |

Results are cluster-level FWE corrected at  $p < 0.05$  (cluster-forming threshold at voxel-level  $p < 0.001$ ),  $p < 0.05$  (uncorrected) for contrast analysis;  $k_E$ : cluster extent; Lat.: laterality; L: left; R: right; BA: Brodmann Area; SI: primary somatosensory cortex; PMC: premotor cortex; SMA: supplementary motor area; M1: primary motor cortex; SI/II: primary/secondary somatosensory cortex; IPS: intraparietal sulcus; IPC: inferior parietal cortex; SPL: superior parietal lobule.

**Table S-4** Resting-state connectivity of cortical and striatal seeds in manifest HD

| $k_E$                                                                                            | MNI co-ordinates |     |    | Lat. | Macroanatomical and cytoarchitectonic area     | $k_E$                                                                                            | MNI co-ordinates |     |    | Lat. | Macroanatomical and cytoarchitectonic area                      |
|--------------------------------------------------------------------------------------------------|------------------|-----|----|------|------------------------------------------------|--------------------------------------------------------------------------------------------------|------------------|-----|----|------|-----------------------------------------------------------------|
|                                                                                                  | x                | y   | z  |      |                                                |                                                                                                  | x                | y   | z  |      |                                                                 |
| <b><i>IFJ</i> <math>\cap</math> striatal seeds</b>                                               |                  |     |    |      |                                                | <b><i>M1</i> <math>\cap</math> striatal seeds</b>                                                |                  |     |    |      |                                                                 |
| 3,256                                                                                            | -32              | 20  | 0  | L    | Anterior insula                                | 5,191                                                                                            | -4               | -8  | 64 | L    | SMA [BA 6], Middle cingulate cortex                             |
|                                                                                                  | -58              | 16  | 14 | L    | Inferior frontal gyrus, p.opercularis [BA 44]  |                                                                                                  | 8                | -4  | 54 | R    | SMA [BA 6], Middle cingulate cortex                             |
|                                                                                                  | -54              | 22  | 12 | L    | Inferior frontal gyrus, p.triangularis [BA 45] |                                                                                                  | -20              | -12 | 64 | L    | Precentral gyrus, PMC [BA6]; M1 [4a]                            |
|                                                                                                  | -44              | 34  | -8 | L    | Inferior frontal gyrus, p.orbitalis            |                                                                                                  | 22               | -20 | 64 | R    | Precentral gyrus, PMC [BA6]; M1 [4a,4p]; SI [3b]                |
|                                                                                                  | -54              | -2  | 44 | L    | Precentral gyrus, PMC [BA 6]                   | 1,360                                                                                            | -58              | 10  | 16 | L    | Inferior frontal gyrus, p. opercularis [BA 44]                  |
| 2,452                                                                                            | -4               | 8   | 54 | L    | SMA [BA 6]                                     |                                                                                                  | -50              | 32  | 12 | L    | Inferior frontal gyrus, p. triangularis [BA 45]                 |
|                                                                                                  | 6                | 6   | 60 | R    | SMA [BA 6]                                     |                                                                                                  | -54              | -2  | 44 | L    | Precentral gyrus, PMC [BA 6]                                    |
|                                                                                                  | -2               | 26  | 40 | L    | Superior medial gyrus                          |                                                                                                  | -46              | 32  | 32 | L    | Middle frontal gyrus                                            |
|                                                                                                  | 6                | 42  | 34 | R    | Superior medial gyrus                          | 1,158                                                                                            | 34               | -14 | 10 | R    | Posterior Insula [lg2, lg1]                                     |
|                                                                                                  | 12               | 12  | 34 | R    | Middle cingulate cortex                        |                                                                                                  | 62               | -16 | 2  | R    | Superior temporal gyrus                                         |
| 1,396                                                                                            | 32               | 20  | 0  | R    | Anterior Insula                                |                                                                                                  | 36               | -12 | 4  | R    | Putamen                                                         |
|                                                                                                  | 56               | 2   | 44 | R    | Precentral gyrus, PMC [BA 6]                   |                                                                                                  | 46               | -20 | 10 | R    | Heschl's gyrus [TE 1.0,1.1,1.2,3]; SII [OP2,1]                  |
|                                                                                                  | 56               | 16  | 10 | R    | Inferior frontal gyrus, p. opercularis [BA 44] | 954                                                                                              | -32              | -22 | 10 | L    | Posterior Insula [lg2, lg1]                                     |
|                                                                                                  | 58               | 24  | 2  | R    | Inferior frontal gyrus, p.triangularis [BA 45] |                                                                                                  | -32              | 4   | -2 | L    | Putamen                                                         |
|                                                                                                  | 50               | 6   | 14 | R    | Rolandic operculum                             |                                                                                                  | -46              | -34 | 14 | L    | IPC [PFcm]                                                      |
| 411                                                                                              | -34              | 14  | 54 | L    | Middle frontal gyrus                           |                                                                                                  | -42              | -20 | 14 | L    | Parietal operculum, SII [OP1,2,3]                               |
|                                                                                                  | -38              | -10 | 56 | L    | Precentral gyrus, PMC [BA 6]                   | 587                                                                                              | 58               | 2   | 34 | R    | Precentral gyrus, PMC [BA6]                                     |
| 303                                                                                              | -18              | -4  | 16 | L    | Thalamus [prefrontal]                          |                                                                                                  | 60               | 2   | 38 | R    | Precentral gyrus                                                |
|                                                                                                  | -14              | 0   | 14 | L    | Caudate nucleus                                |                                                                                                  | 56               | 6   | 14 | R    | Inferior frontal gyrus [BA 44]                                  |
|                                                                                                  | -18              | 8   | 0  | L    | Putamen                                        | 164                                                                                              | -20              | -20 | 4  | L    | Thalamus                                                        |
| 156                                                                                              | 18               | -2  | 16 | R    | Caudate nucleus                                | 152                                                                                              | 18               | -18 | 2  | R    | Thalamus                                                        |
|                                                                                                  |                  |     |    |      |                                                | 152                                                                                              | -60              | -16 | 2  | L    | Superior temporal gyrus                                         |
|                                                                                                  |                  |     |    |      |                                                |                                                                                                  | -58              | -10 | 2  | L    | Heschl's gyrus [TE1.2,3]                                        |
|                                                                                                  |                  |     |    |      |                                                | 103                                                                                              | 52               | -18 | 60 | R    | Postcentral gyrus, SI [BA 1]                                    |
|                                                                                                  |                  |     |    |      |                                                |                                                                                                  | 46               | -8  | 60 | R    | Precentral gyrus, PMC [BA6]                                     |
| <b>Contrast: <i>IFJ</i> <math>\cap</math> striatum &gt; <i>M1</i> <math>\cap</math> striatum</b> |                  |     |    |      |                                                | <b>Contrast: <i>M1</i> <math>\cap</math> striatum &gt; <i>IFJ</i> <math>\cap</math> striatum</b> |                  |     |    |      |                                                                 |
| 1,269                                                                                            | -32              | 22  | -2 | L    | Anterior insula                                | 2,035                                                                                            | -20              | -12 | 64 | L/R  | Precentral gyrus, PMC [BA 6],                                   |
|                                                                                                  | -54              | 22  | 12 | L    | Inferior frontal gyrus, p.triangularis [BA 45] |                                                                                                  | -10              | -36 | 72 | L/R  | M1 [4a]; right M1 [4p], SI [3b]                                 |
|                                                                                                  | -52              | 16  | 10 | L    | Inferior frontal gyrus, p.opercularis [BA 44]  |                                                                                                  | 2                | -14 | 56 | L/R  | SMA [BA 6]                                                      |
|                                                                                                  | -44              | 34  | -8 | L    | Inferior frontal gyrus, p.orbitalis            | 1086                                                                                             | 34               | -14 | 10 | R    | Posterior insula [lg2,1]                                        |
| 866                                                                                              | 40               | 24  | -4 | R    | Anterior insula                                |                                                                                                  | 62               | -16 | 2  | R    | Superior temporal gyrus; SII [OP2,1]                            |
|                                                                                                  | 56               | 16  | 10 | R    | Inferior frontal gyrus, p. opercularis [BA 44] |                                                                                                  | 68               | -24 | 2  | R    | Heschl's gyrus [TE 1.0,1.1,1.2,3]                               |
|                                                                                                  | 58               | 24  | 2  | R    | Inferior frontal gyrus, p.triangularis [BA 45] |                                                                                                  | 36               | -8  | 2  | R    | Putamen                                                         |
|                                                                                                  | 54               | 32  | -8 | R    | Inferior frontal gyrus, p.orbitalis            | 644                                                                                              | -32              | -22 | 10 | L    | Insula [lg1,2]                                                  |
| 595                                                                                              | 0                | 10  | 54 | L    | SMA [BA6]                                      |                                                                                                  | -46              | -34 | 14 | L    | IPC [PFcm]                                                      |
|                                                                                                  | 6                | 8   | 58 | R    | SMA [BA6]                                      |                                                                                                  | -42              | -20 | 14 | L    | Parietal operculum [OP1,2,3]                                    |
|                                                                                                  | 0                | 32  | 38 | L    | Superior medial gyrus                          |                                                                                                  | -32              | 6   | -2 | L    | Putamen                                                         |
|                                                                                                  | 8                | 12  | 44 | R    | Middle cingulate cortex                        | 163                                                                                              | -20              | -20 | 4  | L    | Thalamus [somatosensory, motor, premotor, prefrontal]           |
| 164                                                                                              | -14              | 0   | 14 | L    | Caudate nucleus                                |                                                                                                  |                  |     |    | R    | Thalamus [somatosensory, premotor, motor, prefrontal, parietal] |
|                                                                                                  | -22              | -2  | 12 | L    | Putamen                                        | 152                                                                                              | 18               | -18 | 2  | R    | Thalamus [somatosensory, premotor, motor, prefrontal, parietal] |
|                                                                                                  | -20              | -12 | 20 | L    | Thalamus [prefrontal]                          |                                                                                                  |                  |     |    | L    | Superior temporal gyrus                                         |
| 124                                                                                              | 18               | -2  | 16 | R    | Caudate nucleus                                | 152                                                                                              | -60              | -16 | 2  | L    | Heschl's gyrus [TE1.2,3]                                        |
|                                                                                                  |                  |     |    |      |                                                | 106                                                                                              | -22              | 18  | 52 | L    | Superior frontal gyrus, Middle frontal gyrus                    |

Results are cluster-level FWE corrected at  $p < 0.05$  (cluster-forming threshold at voxel-level  $p < 0.001$ ; for contrast analysis: masked with  $p < 0.05$ , uncorrected);  $k_E$ : cluster extent; Lat.: laterality; L: left; R: right; BA: Brodmann Area; SI: primary somatosensory cortex; PMC: premotor cortex; SMA: supplementary motor area; M1: primary motor cortex; SI/II: primary/secondary somatosensory cortex; IPS: intraparietal sulcus; IPC: inferior parietal cortex; SPL: superior parietal lobule.

**Table S-5** Conjunction between MACM and resting-state connectivity maps of cortical and striatal seeds in manifest HD

| $k_E$                                                    | MNI co-ordinates |     |    | Lat. | Macroanatomical and cytoarchitectonic region |
|----------------------------------------------------------|------------------|-----|----|------|----------------------------------------------|
|                                                          | x                | y   | z  |      |                                              |
| <b>Manifest HD: IFJ <math>\cap</math> striatal seeds</b> |                  |     |    |      |                                              |
| 217                                                      | -16              | -6  | 18 | L    | Caudate nucleus                              |
|                                                          | -18              | 8   | 0  | L    | Putamen                                      |
| 77                                                       | 16               | -2  | 16 | R    | Caudate nucleus                              |
| 1,334                                                    | -32              | 20  | 0  | L    | Anterior insula                              |
|                                                          | -56              | 14  | 12 | L    | Inferior frontal gyrus [BA 44]               |
|                                                          | -48              | 24  | 12 | L    | Inferior frontal gyrus                       |
|                                                          | -54              | -2  | 44 | L    | Precentral gyrus, PMC [BA 6]                 |
| 561                                                      | 54               | 16  | 10 | R    | Inferior frontal gyrus [BA 44]               |
|                                                          | 40               | 24  | -4 | R    | Anterior insula                              |
|                                                          | 52               | 2   | 42 | R    | Precentral gyrus                             |
| 1,481                                                    | -4               | 8   | 54 | L    | SMA [BA 6]; middle cingulate cortex          |
|                                                          | -2               | 26  | 40 | L    | Superior medial gyrus                        |
|                                                          | 6                | 6   | 60 | R    | SMA [BA 6]; middle cingulate cortex          |
| 144                                                      | -38              | -10 | 56 | L    | Precentral gyrus, PMC [BA 6]                 |
|                                                          |                  |     |    | L    | Middle frontal gyrus                         |
| <b>Manifest HD: M1 <math>\cap</math> striatal seeds</b>  |                  |     |    |      |                                              |
| 107                                                      | -10              | -20 | -2 | L    | Thalamus [prefrontal, premotor, motor]       |
| 46                                                       | 14               | -18 | 4  | R    | Thalamus [prefrontal, premotor]              |
| 415                                                      | -36              | -2  | 8  | L    | Insula                                       |
|                                                          | -32              | -8  | 2  | L    | Putamen                                      |
| 181                                                      | -58              | 10  | 18 | L    | Inferior frontal gyrus [BA 44]               |
| 171                                                      | 56               | 6   | 14 | R    | Inferior frontal gyrus [BA 44]               |
|                                                          | 60               | 6   | 24 | R    | Precentral gyrus                             |
| 1,032                                                    | -4               | -8  | 64 | L    | SMA [BA 6]                                   |
|                                                          | 8                | -4  | 58 | R    | SMA [BA 6]                                   |
|                                                          | -4               | 24  | 42 | L    | Superior medial gyrus                        |
| 325                                                      | -26              | -16 | 66 | L    | Precentral gyrus, PMC [BA 6]                 |
|                                                          | -40              | -16 | 50 | L    | Precentral gyrus; M1 [BA 4a]                 |
|                                                          | -26              | -2  | 54 | L    | Middle frontal gyrus                         |
| 215                                                      | -54              | -2  | 44 | L    | Precentral gyrus, PMC [BA 6]                 |

Results are cluster-level FWE corrected at  $p < 0.05$  (cluster-forming threshold at voxel-level  $p < 0.001$ );  $k_E$ : cluster extent; Lat.: laterality; L: left; R: right; BA: Brodmann Area; SI: primary somatosensory cortex; PMC: premotor cortex; SMA: supplementary motor area; M1: primary motor cortex; SI: primary somatosensory cortex; IPS: intraparietal sulcus; IPC: inferior parietal cortex; SPL: superior parietal lobule.

**Table S-6** Contrast maps between MOG-striatal and IFJ-striatal connectivity

| MNI co-ordinates                                                                             |     |     |     |      |                                                     | MNI co-ordinates                                                                                                   |     |     |    |      |                                                |
|----------------------------------------------------------------------------------------------|-----|-----|-----|------|-----------------------------------------------------|--------------------------------------------------------------------------------------------------------------------|-----|-----|----|------|------------------------------------------------|
| $k_E$                                                                                        | x   | y   | z   | Lat. | Macroanatomical and cytoarchitectonic area          | $k_E$                                                                                                              | x   | y   | z  | Lat. | Macroanatomical and cytoarchitectonic area     |
| <b>MACM: Contrast (MOG <math>\cap</math> striatum) &gt; (IFJ <math>\cap</math> striatum)</b> |     |     |     |      |                                                     | <b>Resting-state connectivity: Contrast (MOG <math>\cap</math> striatum) &gt; (IFJ <math>\cap</math> striatum)</b> |     |     |    |      |                                                |
| 783                                                                                          | 32  | -74 | 26  | R    | Middle occipital gyrus                              | 207                                                                                                                | -58 | -34 | 46 | L    | IPC [PF,PfT]                                   |
| 224                                                                                          | -28 | -82 | 32  | L    | Middle occipital gyrus                              | 136                                                                                                                | 62  | -26 | 34 | R    | IPC [PF,PfT]                                   |
|                                                                                              |     |     |     |      |                                                     | 91                                                                                                                 | 42  | -2  | 52 | R    | Middle frontal gyrus                           |
|                                                                                              |     |     |     |      |                                                     |                                                                                                                    | 48  | 4   | 50 | R    | Precentral gyrus                               |
| <b>MACM: Contrast (MOG <math>\cap</math> striatum) &lt; (IFJ <math>\cap</math> striatum)</b> |     |     |     |      |                                                     | <b>Resting-state connectivity: Contrast (MOG <math>\cap</math> striatum) &lt; (IFJ <math>\cap</math> striatum)</b> |     |     |    |      |                                                |
| 1,038                                                                                        | -42 | 8   | 24  | L    | Inferior frontal gyrus, p. opercularis [BA 44]      | 2,274                                                                                                              | -4  | 8   | 54 | L    | SMA [BA 6]                                     |
|                                                                                              | -38 | 30  | 20  | L    | Inferior frontal gyrus, p. triangularis [BA 45]     |                                                                                                                    | 6   | 6   | 60 | R    | SMA [BA 6]                                     |
|                                                                                              |     |     |     | L    | Precentral gyrus [BA 6]                             |                                                                                                                    | -2  | 26  | 40 | L    | Superior medial gyrus                          |
| 1,019                                                                                        | -22 | 4   | 6   | L    | Putamen; Pallidum                                   |                                                                                                                    | 6   | 14  | 42 | R    | Middle cingulate cortex                        |
|                                                                                              | -44 | 20  | 0   | L    | Inferior frontal gyrus [BA 44, 45]                  | 2,246                                                                                                              | -32 | 20  | 0  | L    | Anterior insula                                |
|                                                                                              | -44 | 10  | -8  | L    | Anterior insula                                     |                                                                                                                    | -58 | 16  | 14 | L    | Inferior frontal gyrus, p.opercularis [BA 44]  |
| 697                                                                                          | -30 | -54 | 42  | L    | IPS [hIP3,2,1]                                      |                                                                                                                    | -54 | 22  | 12 | L    | Inferior frontal gyrus, p.triangularis [BA 45] |
|                                                                                              | -44 | -36 | 46  | L    | IPC [PFt], BA2                                      |                                                                                                                    | -44 | 34  | -8 | L    | Inferior frontal gyrus, p.orbitalis            |
|                                                                                              | -16 | -68 | 44  | L    | SPL [7A,7PC]                                        | 1,062                                                                                                              | 56  | 2   | 44 | R    | Precentral gyrus, PMC [BA 6]                   |
| 653                                                                                          | 34  | 20  | -10 | R    | Anterior insula                                     |                                                                                                                    | 56  | 16  | 10 | R    | Inferior frontal gyrus, p.opercularis [BA 44]  |
|                                                                                              | 22  | 6   | 8   | R    | Putamen                                             |                                                                                                                    |     |     |    | R    | Inferior frontal gyrus, p.triangularis [BA 45] |
|                                                                                              | 48  | 30  | 2   | R    | Inferior frontal gyrus, p. triangularis [BA 45]     |                                                                                                                    | 36  | 18  | 0  | R    | Anterior insula                                |
| 555                                                                                          | 42  | 10  | 34  | R    | Inferior frontal gyrus, p. opercularis [BA 44]      | 303                                                                                                                | -14 | 0   | 14 | L    | Caudate nucleus                                |
|                                                                                              |     |     |     |      | Precentral gyrus                                    |                                                                                                                    | -18 | 8   | 0  | L    | Putamen; Pallidum                              |
| 524                                                                                          | 2   | 22  | 40  | L/R  | Superior medial gyrus                               |                                                                                                                    | -20 | -12 | 20 | L    | Thalamus [prefrontal]                          |
|                                                                                              | 12  | 12  | 60  | R    | SMA [BA 6]                                          | 211                                                                                                                | -44 | 0   | 46 | L    | Precentral gyrus                               |
|                                                                                              | -8  | 14  | 56  | L    | SMA [BA 6]                                          |                                                                                                                    | -54 | 18  | 34 | L    | Inferior frontal gyrus, p.opercularis [BA 44]  |
|                                                                                              | -6  | 28  | 28  | L/R  | Mid-cingulate cortex                                |                                                                                                                    | -50 | 28  | 32 | L    | Inferior frontal gyrus, p.triangularis [BA 45] |
| 392                                                                                          | 12  | -10 | 10  | R    | Thalamus [prefrontal, temporal];<br>caudate nucleus |                                                                                                                    | -50 | 18  | 42 | L    | Middle frontal gyrus                           |
|                                                                                              |     |     |     |      |                                                     | 177                                                                                                                | -56 | -2  | 42 | L    | Precentral gyrus, PMC [BA 6]                   |
| 171                                                                                          | -56 | -44 | 8   | L    | Middle temporal gyrus                               | 153                                                                                                                | 18  | -2  | 16 | R    | Caudate nucleus                                |
|                                                                                              | -56 | -42 | 16  | L    | Superior temporal gyrus                             |                                                                                                                    | 18  | 8   | 2  | R    | Pallidum                                       |
|                                                                                              |     |     |     |      |                                                     | 144                                                                                                                | -38 | -10 | 56 | L    | Precentral gyrus, PMC [BA 6]                   |
|                                                                                              |     |     |     |      |                                                     | 96                                                                                                                 | -34 | 14  | 54 | L    | Middle frontal gyurs                           |

$k_E$ : cluster extent; Lat.: laterality; L: left; R: right; BA: Brodmann Area; SI: primary somatosensory cortex; PMC: premotor cortex; SMA: supplementary motor area; M1: primary motor cortex; SI: primary somatosensory cortex; IPS: intraparietal sulcus; IPC: inferior parietal cortex; SPL: superior parietal lobule.

**Table S-7** Contrast maps between MOG-striatal and M1-striatal connectivity

| MNI co-ordinates                                                                            |     |     |    |      |                                               | MNI co-ordinates                                                                                                  |     |     |    |      |                                                    |
|---------------------------------------------------------------------------------------------|-----|-----|----|------|-----------------------------------------------|-------------------------------------------------------------------------------------------------------------------|-----|-----|----|------|----------------------------------------------------|
| $k_E$                                                                                       | x   | y   | z  | Lat. | Macroanatomical and cytoarchitectonic area    | $k_E$                                                                                                             | x   | y   | z  | Lat. | Macroanatomical and cytoarchitectonic area         |
| <b>MACM: Contrast (MOG <math>\cap</math> striatum) &gt; (M1 <math>\cap</math> striatum)</b> |     |     |    |      |                                               | <b>Resting-state connectivity: Contrast (MOG <math>\cap</math> striatum) &gt; (M1 <math>\cap</math> striatum)</b> |     |     |    |      |                                                    |
| 757                                                                                         | 32  | -74 | 26 | R    | Middle occipital gyrus                        | 207                                                                                                               | -58 | -34 | 46 | L    | IPC [PF,PfT]                                       |
| 216                                                                                         | -28 | -80 | 28 | L    | Middle occipital gyrus                        | 136                                                                                                               | 62  | -26 | 34 | R    | IPC [PF,PfT]                                       |
| 117                                                                                         | 24  | -60 | 48 | R    | SPL [7A]                                      | 103                                                                                                               | 42  | -2  | 52 | R    | Middle frontal gyrus                               |
| 113                                                                                         | -24 | -62 | 54 | L    | SPL [7A]                                      |                                                                                                                   | 48  | 4   | 50 | R    | Precentral gyrus                                   |
| <b>MACM: Contrast (MOG <math>\cap</math> striatum) &lt; (M1 <math>\cap</math> striatum)</b> |     |     |    |      |                                               | <b>Resting-state connectivity: Contrast (MOG <math>\cap</math> striatum) &lt; (M1 <math>\cap</math> striatum)</b> |     |     |    |      |                                                    |
| 1,834                                                                                       | -36 | -44 | 38 | L    | IPS [hIP1-3]                                  | 4,959                                                                                                             | -4  | -8  | 64 | L    | SMA [BA 6], M1 [4a]                                |
|                                                                                             | -52 | -26 | 32 | L    | IPC [PFt, PFop]                               |                                                                                                                   | 8   | -4  | 58 | R    | SMA [BA 6], M1 [4a, 4p], SI [3b]                   |
|                                                                                             | -48 | -24 | 22 | L    | Parietal operculum [OP1]                      |                                                                                                                   | -8  | -8  | 50 | L    | Middle cingulate cortex                            |
|                                                                                             | -26 | -16 | 66 | L    | Precentral gyrus, PMC [BA6], M1 [4p,4a]       | 1,158                                                                                                             | 34  | -14 | 10 | R    | Insula [lg2, lg1]                                  |
|                                                                                             | -40 | -44 | 60 | L    | Postcentral gyrus, SI [BA 2,3b,3a]            |                                                                                                                   | 62  | -16 | 2  | R    | Superior temporal gyrus                            |
| 729                                                                                         | -26 | 2   | 4  | L    | Putamen                                       |                                                                                                                   | 36  | -8  | 2  | R    | Putamen                                            |
|                                                                                             | -48 | -2  | 10 | L    | Insula, rolandic operculum                    |                                                                                                                   | 68  | -24 | 2  | R    | Heschl's g. [TE1.0,1.1,3], parietal operc. [OP2,1] |
| 479                                                                                         | -4  | -4  | 52 | L    | SMA [BA 6]                                    | 954                                                                                                               | -36 | -2  | 8  | L    | Insula [lg2,lg1]                                   |
|                                                                                             | 8   | 4   | 64 | R    | SMA [BA 6]                                    |                                                                                                                   | -46 | -34 | 14 | L    | IPC [PFcm]                                         |
| 436                                                                                         | 28  | 6   | 6  | R    | Putamen                                       |                                                                                                                   | -42 | -20 | 14 | L    | Parietal operculum [OP1-3]                         |
|                                                                                             | 36  | 20  | -8 | R    | Insula                                        |                                                                                                                   | -20 | 10  | -2 | L    | Putamen                                            |
| 394                                                                                         | 40  | -28 | 54 | R    | Postcentral gyrus, SI [BA 3b,2]               | 532                                                                                                               | -58 | 10  | 16 | L    | Inferior frontal gyrus, p.opercularis [BA 44]      |
|                                                                                             | 46  | -30 | 44 | R    | IPC [PFt]                                     |                                                                                                                   | -52 | 32  | 10 | L    | Inferior frontal gyrus, p.triangularis [BA 45]     |
|                                                                                             | 34  | -22 | 52 | R    | Precentral gyrus, M1 [4p,4a]                  | 431                                                                                                               | 58  | 2   | 34 | R    | Precentral gyrus, PMC [BA6]                        |
|                                                                                             | 32  | -16 | 52 | R    | Precentral gyrus, PMC [BA6]                   |                                                                                                                   | 56  | 6   | 14 | R    | Inferior frontal gyrus, p.opercularis [BA 44]      |
| 149                                                                                         | 64  | -22 | 18 | R    | Parietal operculum [OP1]                      | 186                                                                                                               | -56 | -2  | 42 | L    | Precentral gyrus, PMC [BA6]                        |
|                                                                                             | 64  | -30 | 18 | R    | IPC [PF, PFop]                                | 164                                                                                                               | -20 | -20 | 4  | L    | Thalamus                                           |
| 104                                                                                         | 54  | 18  | 8  | R    | Inferior frontal gyrus, p.opercularis [BA 44] | 152                                                                                                               | 18  | -18 | 2  | R    | Thalamus                                           |
|                                                                                             |     |     |    |      |                                               | 152                                                                                                               | -60 | -16 | 2  | L    | Superior temporal gyrus                            |
|                                                                                             |     |     |    |      |                                               |                                                                                                                   | -58 | -10 | 2  | L    | Heschl's gyrus [TE1.2,3]                           |
|                                                                                             |     |     |    |      |                                               | 113                                                                                                               | -52 | 20  | 32 | L    | Inferior frontal gyrus [BA 44, 45]                 |
|                                                                                             |     |     |    |      |                                               |                                                                                                                   | -46 | 32  | 30 | L    | Middle frontal gyrus                               |
|                                                                                             |     |     |    |      |                                               | 97                                                                                                                | 52  | -18 | 60 | R    | Postcentral gyrus, SI [BA 1]                       |
|                                                                                             |     |     |    |      |                                               |                                                                                                                   | 44  | -6  | 58 | R    | Precentral gyurs, PMC [BA 6]                       |

$k_E$ : cluster extent; Lat.: laterality; L: left; R: right; BA: Brodmann Area; SI: primary somatosensory cortex; PMC: premotor cortex; SMA: supplementary motor area; M1: primary motor cortex; St: primary somatosensory cortex; IPS: intraparietal sulcus; IPC: inferior parietal cortex; SPL: superior parietal lobule.



**Figure S-1 – Overview on workflow with applied techniques and related research questions**

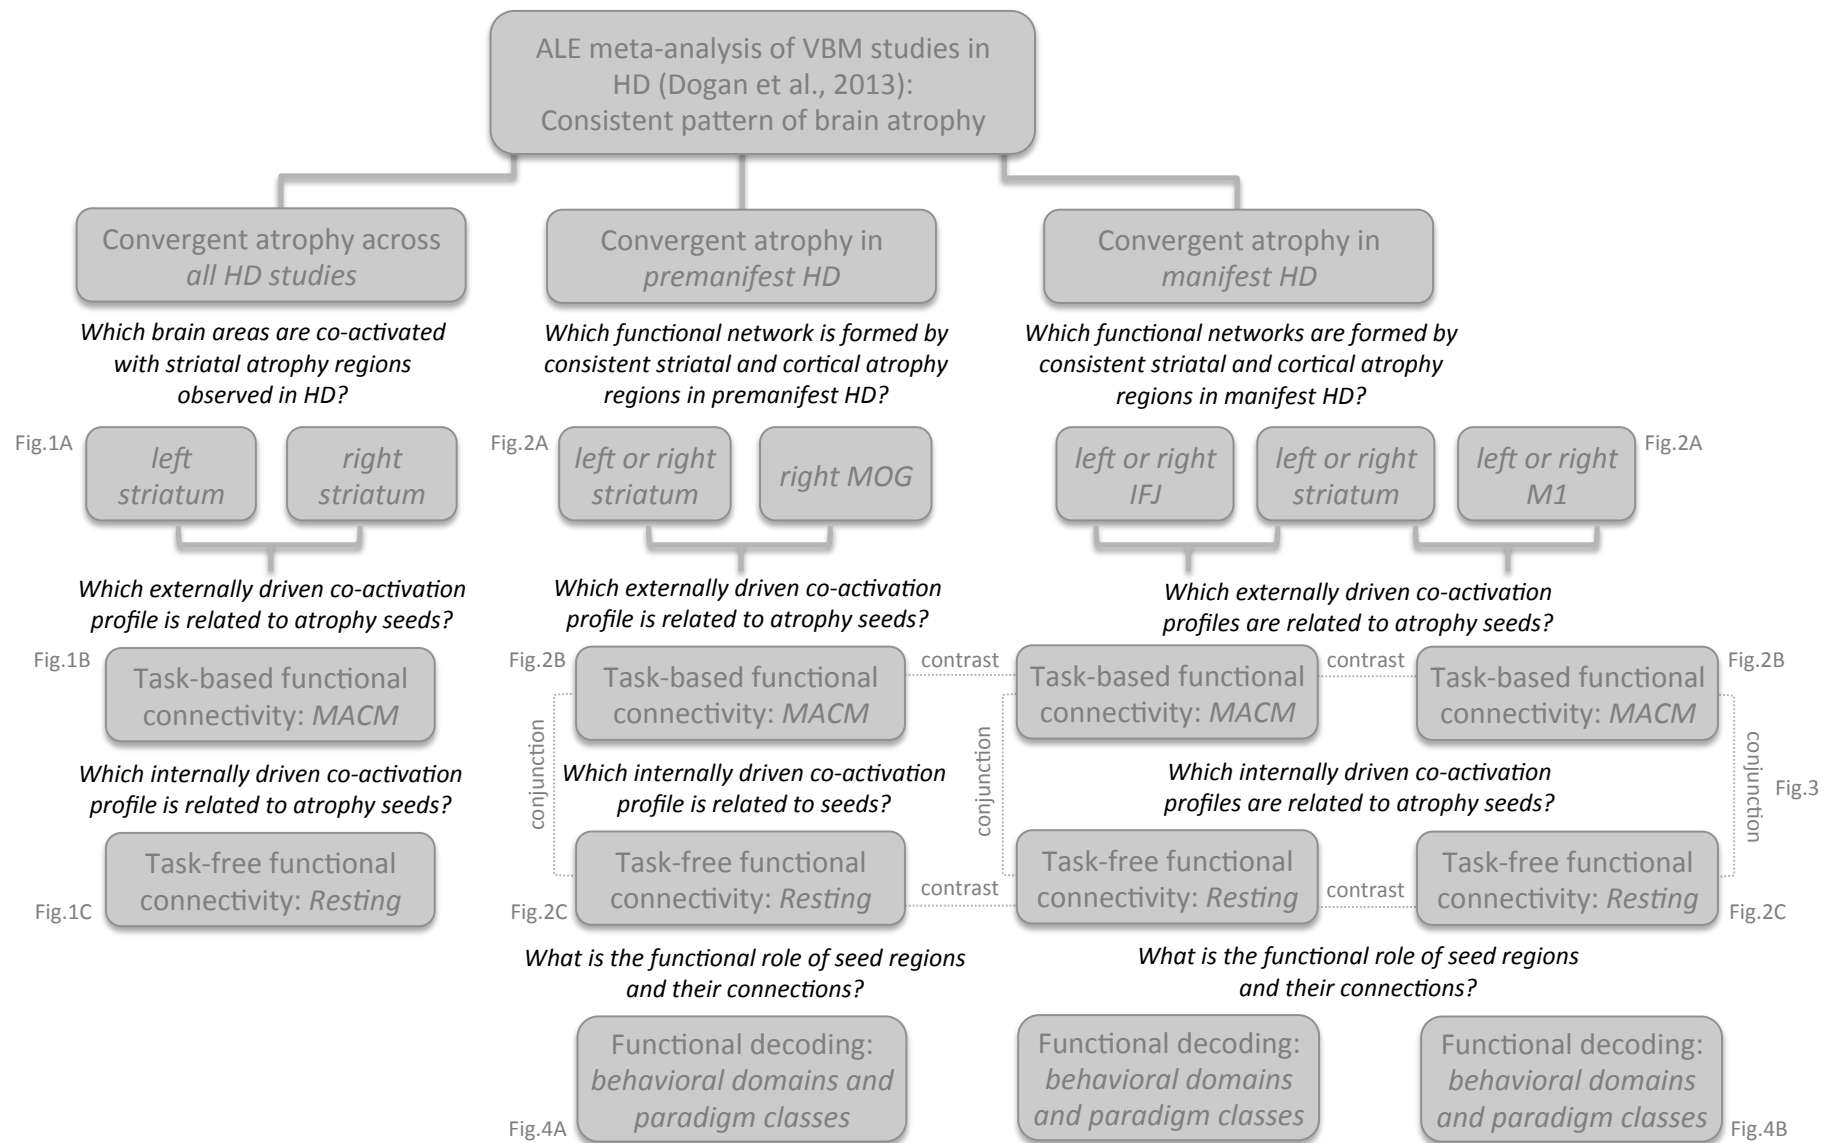

*Abbreviations:* HD, Huntington's disease; ALE, anatomical likelihood estimation; VBM, voxel-based morphometry; MOG, middle occipital gyrus; IFJ, inferior frontal junctions; M1, primary motor cortex; MACM, meta-analytic connectivity modeling.

# Figure S-2 – Functional characterization by behavioral domains and paradigm classes of premanifest and manifest atrophy seeds

## A Functional characterization of premanifest atrophy seeds

### left striatum

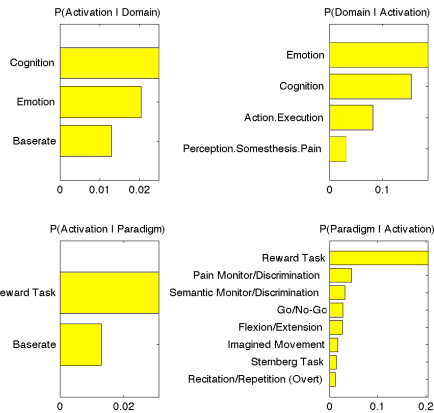

### right striatum

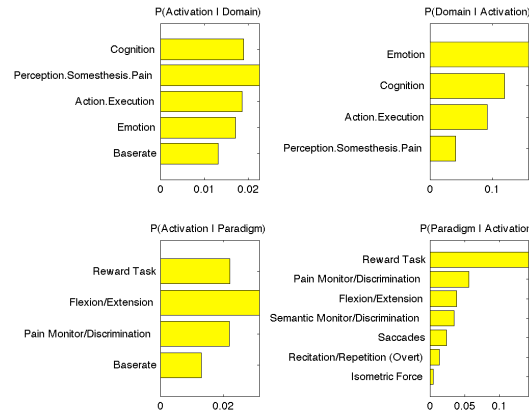

### right MOG

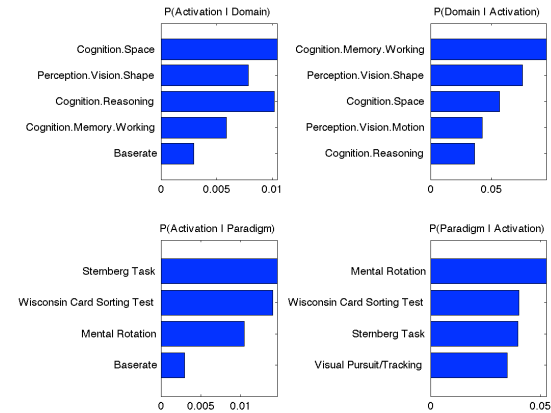

## B Functional characterization of manifest atrophy seeds

### left striatum

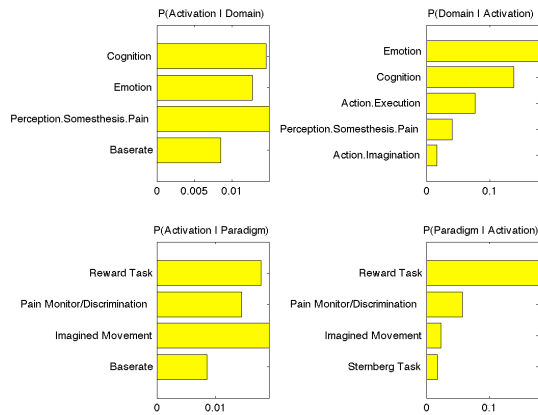

### left IFJ

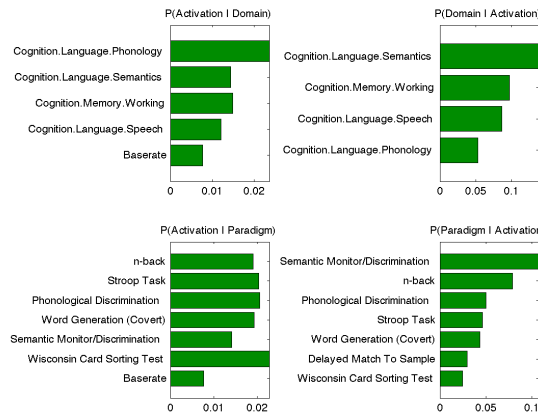

### left M1

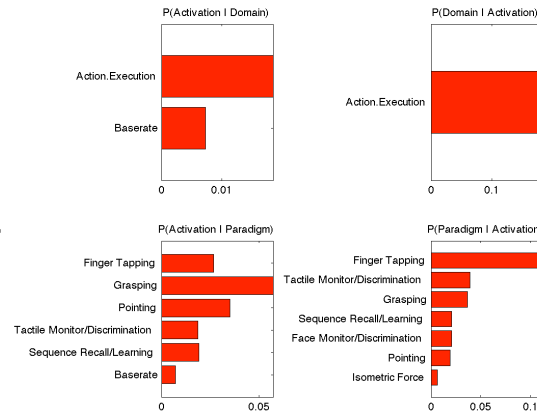

### right striatum

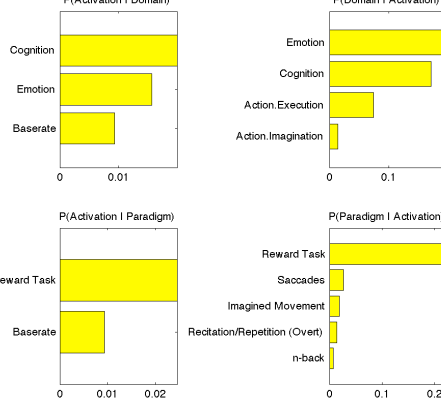

### right IFJ

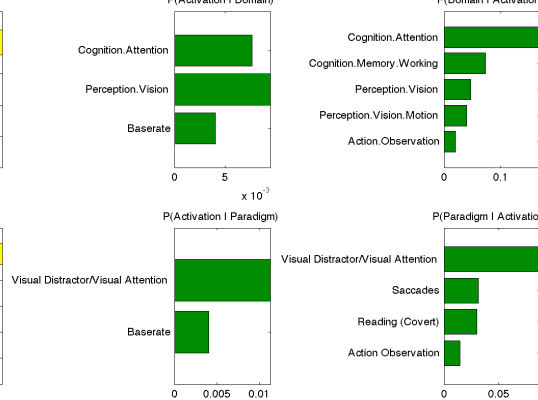

### right M1

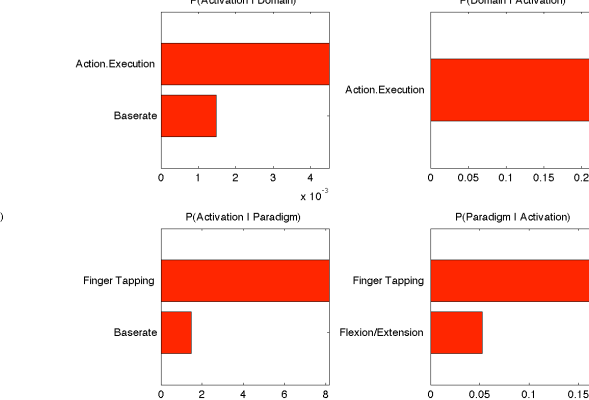

Supplement: mmc1.pdf [file mmc1.pdf]
